# Supplementary material for: Iron Deficiency without Anemia Decreases Physical Endurance and Mitochondrial Complex I Activity of Oxidative Skeletal Muscle in the Mouse
Source: Nutrients. 2021 Mar 24;13(4):1056. doi: 10.3390/nu13041056 (PMC8064065; doi:10.3390/nu13041056)
Supplement: Supplementary file 1 [file nutrients-13-01056-s001.xlsx]

## Sheet: Figure 1
Figure 1		A	B	C	D	E	F	G	H	I	J
Identification	Group	Hemoglobin g/dL	Hematocrit (%)	MCV (fL)	MCH (pg)	MCHC (g/dL)	Reticulocytes (%)	RetHb (pg)	% Hypo RBC	Spleen iron mcg/g)	Liver iron (mcg/g)
ID1	Iron deficiency	13.5	42.3	45	14.3	31.9	4.59	15.8	80	119.683	17.1848
ID2	Iron deficiency	13.5	43.2	44.3	13.8	31.3	3.88	15.2	85.3	100.98	38.8648
ID3	Iron deficiency	13.7	43.6	45.9	14.4	31.4	4.34	15.9	78	137.371	34.8502
ID4	Iron deficiency	13.4	41.4	43.7	14.1	32.4	3.44	15.6	86.9	72.4391	41.9382
ID5	Iron deficiency	14.3	45.4	45.4	14.3	31.5	3.59	13.4	74.4	73.4391	36.9345
ID6	Iron deficiency	14.1	43.8	44.3	14.3	32.2	3.56	16.2	78.3	141.829	39.0132
ID7	Iron deficiency	13.9	44.2	45.9	14.4	31.4	4.09	15.5	84.8	131.727	30.375
ID8	Iron deficiency	14	45.1	45.4	14.1	31	3.7	15.5	80.7	142.703	47.2026
C1	Control	14.5	44.9	45.8	14.8	32.3	3.95	16.4	75.5	308.246	60.8286
C2	Control	13.9	43.8	47.5	15.1	31.7	3.56	16.7	77.2	335.609	62.1633
C3	Control	14.4	45.9	47.6	14.9	31.4	4.14	17.2	69.6	437.611	46.4478
C4	Control	13.2	42	47.9	15.1	31.4	4.51	16.3	73.3	265.387	65.3074
C5	Control	13.6	43.2	46.6	14.7	31.5	3.36	16.6	75.6	366.018	57.654
C6	Control	14.1	45.4	49.6	15.4	31.1	5.4	17.3	69.5	309.099	64.9972
C7	Control	13.2	43.6	48	14.5	30.3	3.92	17.1	68.5	322.136	63.7475
C8	Control	14.3	46.2	47	14.5	31	3.99	16.8	80.4	285.914	54.675

## Sheet: Figure 2
Figure 2		A		B		C		D		E		F
Identification	Group	Test 1 max durations (s)		Test 1 number of falls		Test 2 max duration (s)		Test 2 number of falls		Distance over 1 hour		Mice weight
		Day 0	Day 21	Day 0	Day 21	Day 0	Day 21	Day 0	Day 21	Day 0	Day 21	Day 0	Day 21
ID1	Iron deficiency	550.57	430.43	16	8	245.5	217.38	14	14	98.7508	97.5701	23.4	24.4
ID2	Iron deficiency	256.37	207.02	16	20	237.22	126.12	12	25	94.9953	77.96	23.2	23.6
ID3	Iron deficiency	599.07	268.55	10	15	194.73	182.85	15	16	95.6428	88.5291	23.9	25.1
ID4	Iron deficiency	275.42	326.95	17	11	125.93	213.17	23	13	80.9789	93.8635	22.6	24.6
ID5	Iron deficiency	206.58	223.18	23	29	186.25	136.72	24	26	80.2326	74.8673	24.2	26.2
ID6	Iron deficiency	96.73	151.9	45	27	113.22	99.28	37	37	70.0605	71.9645	22.7	24.2
ID7	Iron deficiency	250.6	229.03	15	17	175.32	136.62	18	22	87.805	82.5116	23.5	25.4
ID8	Iron deficiency	242.5	201.82	20	26	175.1	115.47	20	55	85.0617	73.2717	22.6	23.3
C1	Control	204.67	716.18	19	8	193.13	429.95	18	8	87.0022	110.241	23.2	25.6
C2	Control	265.85	326.4	14	12	182.62	166.58	20	16	86.9497	91.7972	21.8	26.1
C3	Control	352.35	621.07	15	10	193.5	445.92	15	8	88.8387	113.338	22.6	26.2
C4	Control	882.07	770.85	9	6	261.23	343.82	16	10	97.8996	106.974	23	27.6
C5	Control	225.77	566.43	28	14	220.47	192.53	26	13	81.043	99.0958	23.9	23.4
C6	Control	563.65	375.15	15	10	201.15	234.07	21	15	87.0045	96.03	23.1	27.7
C7	Control	111.43	294.75	62	14	114.73	139.42	45	19	69.2403	84.1426	22.9	26.8
C8	Control	224.4	519.2	23	10	158.15	172.32	26	20	78.3138	89.4132	23.5	25.6

## Sheet: Figure 3
Figure 3		A	B	C	D	E	F	G	H	I	J
		Soleus	Soleus	Soleus	Soleus	Soleus	Quadriceps	Quadriceps	Quadriceps	Quadriceps	Quadriceps
Identification	Group	CI activity	CIV activity	CS activity	CI/CS	CIV/CS	CI activity	CIV activity	CS activity	CI/CS	CIV/CS
ID1	Iron deficiency	83.3441	294.054	655.882	0.127072	0.448334	65.0653	429.253	361.88	0.179798	1.18617
ID2	Iron deficiency	54.8767	156.156	460.784	0.119094	0.338892	100.405	561.465	456.989	0.219709	1.22862
ID3	Iron deficiency	69.6047	426.073	585.352	0.118911	0.727892	106.109	511.261	395.221	0.268481	1.29361
ID4	Iron deficiency	122.949	699.954	598.205	0.205531	1.17009	179.329	468.468	593.838	0.301984	0.788883
ID5	Iron deficiency	89.3552	489.331	766.254	0.116613	0.638602	68.5959	465.192	418.895	0.163755	1.11052
ID6	Iron deficiency	214.571	722.479	903.874	0.237391	0.799314	57.8778	447.709	324.488	0.178366	1.37974
ID7	Iron deficiency	218.65	1049.55	882.353	0.247803	1.18949	71.4842	399.431	371.517	0.192412	1.07514
ID8	Iron deficiency	178.227	880.309	836.835	0.212977	1.05195	55.9309	415.572	503.238	0.111142	0.825795
C1	Control	402.389	1362.93	1586.13	0.253691	0.85928	126.559	635.676	700	0.180799	0.908108
C2	Control	291.209	946.456	918.424	0.317075	1.03052	106.223	684.261	565.744	0.187758	1.20949
C3	Control	82.9582	713.514	643.382	0.128941	1.109	117.666	702.168	563.483	0.208819	1.24612
C4	Control	260.031	1226.79	923.913	0.281445	1.32782	122.323	645.198	481.852	0.253861	1.339
C5	Control	162.379	725.225	851.716	0.19065	0.851487	81.1483	518.25	466.95	0.173784	1.10986
C6	Control	255.256	1051.14	1006.79	0.253535	1.04406	54.9453	412.541	325.882	0.168605	1.26592
C7	Control	302.251	822.072	1250	0.241801	0.657658	99.9708	539.312	551.471	0.18128	0.977952
C8	Control	172.795	519.389	911.125	0.18965	0.570052	66.881	614.672	532.213	0.125666	1.15494
